# Supplementary material for: Fair National Greenhouse Gas Reduction Targets Under Multiple Equity Perspectives - A Synthesis Framework
Source: Research Square preprint supplement (doi:10.21203/rs.3.rs-397507/v1), 2021-05-14
Supplement: Supplementary file 1 [file 148779641d06093a8e3ad308.xlsx]

## Sheet: Information
	Fair National Greenhouse Gas Reduction Targets Under Multiple Equity Perspectives - A Synthesis Framework
	Gaurav Ganti*,Andreas Geiges , Louise Jeffery, Hanna Fekete, Matthew Gidden, Michiel Schaeffer, Bill Hare, Niklas Höhne
	Supplementary Information File
	Submitted to: Climatic Change
	* Corresponding author: gaurav.ganti@climateanalytics.org
	Sheet Name	Description
	5th_95th_Linear_Walk	Data for the case where range: 5th and 95th percentile and walk method: linear
	Min_Max_Distribution_Walk	Data for the case where range: min and max and walk method: distribution
	Min_Max_Linear_Walk	Data for the case where range: min and max and walk method: linear
	Column Name	Description
	region	ISO3C code for the country
	2100_GMT<1.5C@P0.5	Fair share levels for emission pathway consistent with keeping warming below 1.5°C in 2100 with a 50% chance
	peak_GMT<2.0C@P0.66	Fair share levels for emission pathway consistent with keeping warming below 2°C in 2100 with a 66% through the course of the century
	peak_GMT<3.0C@P0.66	Fair share levels for emission pathway consistent with keeping warming below 3°C in 2100 with a 66% through the course of the century
	peak_GMT<4.0C@P0.66	Fair share levels for emission pathway consistent with keeping warming below 4°C in 2100 with a 66% through the course of the century

## Sheet: 5th_95th_Linear_Walk
region	2100_GMT<1.5C@P0.5	peak_GMT<2.0C@P0.66	peak_GMT<3.0C@P0.66	peak_GMT<4.0C@P0.66
ABW	1.60443	1.85157	2.55015	2.93184
AFG	84.1811	99.7728	143.845	167.925
AGO	84.3452	97.423	134.389	154.587
AIA	0.104384	0.106328	0.111821	0.114823
ALB	8.09333	9.15141	12.1422	13.7763
AND	0.179143	0.244411	0.428901	0.529703
ARE	119.907	135.569	179.84	204.028
ARG	192.374	215.656	281.464	317.421
ARM	8.0406	9.18323	12.413	14.1777
ATG	0.208595	0.282962	0.493169	0.608023
AUS	262.327	304.828	424.96	490.598
AUT	-1.38367	11.803	49.0767	69.4425
AZE	40.8985	46.0844	60.7432	68.7525
BDI	159.157	197.146	304.528	363.199
BEL	-5.66772	14.4013	71.129	102.124
BEN	74.5683	90.3683	135.029	159.431
BFA	270.663	331.746	504.405	598.744
BGD	584.685	724.095	1118.16	1333.47
BGR	33.5423	37.6623	49.3079	55.6708
BHR	24.109	27.6515	37.6647	43.1358
BHS	-0.532103	0.126259	1.9872	3.00399
BIH	24.5448	27.7593	36.8455	41.81
BLR	56.837	63.7945	83.4608	94.2061
BLZ	1.09989	1.22373	1.57377	1.76503
BOL	73.3045	80.7926	101.959	113.523
BRA	859.145	936.061	1153.47	1272.26
BRB	0.747261	0.977579	1.6286	1.98431
BRN	1.14321	3.39417	9.7568	13.2332
BTN	3.11729	3.49813	4.57463	5.16281
BWA	18.1863	20.6911	27.7713	31.6398
CAF	-83.9143	-56.1196	22.4457	65.3725
CAN	298.541	347.102	484.363	559.36
CHE	-31.5624	-14.2964	34.5083	61.1743
CHL	64.3969	72.5895	95.747	108.4
CHN	8458.09	9660.74	13060.2	14917.6
CIV	136.807	165.619	247.061	291.56
CMR	59.7089	70.6251	101.481	118.34
COD	276.388	328.349	475.221	555.47
COG	18.178	20.8833	28.5301	32.7081
COK	0.0328175	0.0453762	0.0808748	0.100271
COL	185.574	219.014	313.539	365.186
COM	3.41699	4.15947	6.25816	7.40486
CPV	1.37993	1.64848	2.40757	2.82232
CRI	15.0982	19.0589	30.2543	36.3712
CUB	35.6251	40.53	54.3944	61.9696
CYP	4.21061	4.93544	6.98425	8.10368
CZE	38.0451	49.9116	83.454	101.781
DEU	-97.1533	58.095	496.924	736.693
DJI	3.30228	3.85647	5.42296	6.27886
DMA	0.192742	0.224968	0.316057	0.365827
DNK	-9.38043	1.75738	33.2398	50.4413
DOM	29.596	37.9488	61.559	74.4592
DZA	193.346	213.127	269.043	299.594
ECU	71.7248	81.192	107.952	122.574
EGY	373.332	406.236	499.243	550.061
ERI	46.8567	57.7528	88.5518	105.38
ESP	59.1769	109.393	251.333	328.888
EST	9.44588	11.0364	15.5322	17.9886
ETH	835.444	1021	1545.48	1832.05
EU27	382.414	953.774	2568.8	3451.22
FIN	1.14553	9.98257	34.9616	48.6097
FJI	2.30387	2.68764	3.77242	4.36513
FRA	-19.482	72.1812	331.279	472.846
FSM	0.331276	0.364648	0.458979	0.510519
GAB	3.45593	5.69311	12.0168	15.4719
GBR	-145.893	-22.6862	325.573	515.856
GEO	12.9822	14.3404	18.1798	20.2776
GHA	138.467	169.629	257.712	305.84
GIN	85.8067	102.489	149.645	175.41
GMB	7.74315	9.25424	13.5255	15.8593
GNB	9.58059	11.6445	17.4783	20.6657
GNQ	8.5779	9.81838	13.3248	15.2406
GRC	35.8816	44.2691	67.9777	80.9317
GRD	0.0568977	0.125345	0.318819	0.424531
GTM	60.4238	71.4416	102.585	119.601
GUY	2.51168	2.82107	3.69561	4.17344
HKG	-30.7271	-14.7522	30.403	55.0751
HND	30.4113	35.0335	48.0989	55.2376
HRV	7.68364	10.3576	17.9157	22.0453
HTI	38.447	44.4997	61.6086	70.9565
HUN	16.3297	22.9305	41.5885	51.7829
IDN	833.668	948.345	1272.5	1449.61
IND	3481.2	3891.9	5052.79	5687.08
IRL	9.6074	16.8538	37.3368	48.5284
IRN	555.234	611.343	769.944	856.601
IRQ	219.922	243.598	310.523	347.089
ISL	1.67092	2.11728	3.37896	4.06833
ISR	50.6871	58.7813	81.6606	94.1615
ITA	38.9132	111.399	316.29	428.239
JAM	6.99073	9.09401	15.0392	18.2876
JOR	38.6487	42.6778	54.0666	60.2892
JPN	377.155	566.932	1103.36	1396.46
KAZ	267.013	310.028	431.615	498.049
KEN	163.028	193.997	281.536	329.365
KGZ	18.832	21.4755	28.9478	33.0305
KHM	42.9731	46.4189	56.1589	61.4807
KIR	0.284241	0.335507	0.480416	0.559593
KNA	0.154906	0.187755	0.280605	0.331337
KOR	237.637	290.563	440.166	521.906
KWT	71.0648	82.4831	114.758	132.393
LAO	27.2138	32.7559	48.4216	56.981
LBN	19.77	23.3928	33.6331	39.2282
LBR	41.2695	50.2246	75.5375	89.368
LBY	33.51	46.4514	83.0318	103.019
LCA	0.632648	0.73261	1.01516	1.16955
LIE	-0.12883	-0.0409661	0.207394	0.343093
LKA	32.3508	42.7442	72.1225	88.1743
LSO	7.79385	8.94162	12.186	13.9586
LTU	6.69742	9.64106	17.9616	22.5079
LUX	-0.921545	1.03472	6.56437	9.58568
LVA	3.07868	4.57342	8.79848	11.107
MAC	-10.3102	-7.45985	0.597002	4.99913
MAR	115.719	126.786	158.071	175.164
MCO	-0.234855	-0.125658	0.183002	0.351649
MDA	14.07	16.175	22.1251	25.3762
MDG	283.333	348.956	534.448	635.797
MDV	0.936027	1.26203	2.18353	2.68703
MEX	421.404	480.224	646.487	737.33
MHL	0.224093	0.243694	0.299099	0.329371
MKD	10.4744	11.5375	14.5423	16.1841
MLI	117.014	136.271	190.703	220.444
MLT	1.04545	1.42243	2.48802	3.07024
MMR	92.8746	102.278	128.857	143.38
MNE	2.84198	3.12466	3.92367	4.36023
MNG	34.0626	40.1362	57.3039	66.684
MOZ	203.963	246.699	367.5	433.503
MRT	12.047	13.4079	17.2548	19.3566
MUS	7.46935	8.55019	11.6053	13.2746
MWI	183.8	226.554	347.405	413.436
MYS	203.444	227.377	295.025	331.987
NAM	12.1078	13.4511	17.2482	19.3228
NER	307.037	375.147	567.669	672.86
NGA	676.693	798.153	1141.48	1329.06
NIC	22.4691	24.7193	31.0797	34.5549
NIU	-2.61752	-1.87339	0.22997	1.37921
NLD	11.4895	37.9129	112.602	153.411
NOR	-12.4407	-0.571711	32.9776	51.3084
NPL	238.781	291.666	441.151	522.827
NRU	0.0228506	0.0284759	0.0443764	0.0530642
NZL	31.9279	37.5043	53.2664	61.8786
OMN	52.0173	59.3233	79.9744	91.2578
PAK	663.383	788.753	1143.13	1336.75
PAN	7.79721	11.2288	20.9288	26.2287
PER	103.334	117.286	156.724	178.272
PHL	262.426	317.171	471.913	556.461
PLW	0.202797	0.220508	0.270572	0.297926
PNG	36.7296	44.5472	66.6448	78.7185
POL	185.251	209.137	276.653	313.543
PRK	98.155	108.803	138.9	155.345
PRT	23.2766	32.2741	57.7066	71.6025
PRY	42.3253	48.0873	64.3742	73.2732
QAT	113.686	135.922	198.775	233.117
ROU	38.5806	51.7585	89.0076	109.36
RUS	975.526	1138.23	1598.14	1849.42
RWA	158.984	197.035	304.593	363.36
SAU	381.166	431.547	573.956	651.765
SDN	38.1281	65.6803	143.56	186.112
SEN	82.2544	99.0691	146.598	172.567
SGP	2.99619	12.1598	38.0618	52.2143
SHN	0.0113751	0.0116744	0.0125205	0.0129828
SLB	-0.338012	-0.0523596	0.755075	1.19624
SLE	41.434	50.4218	75.8267	89.7076
SLV	11.979	14.7815	22.703	27.0312
SMR	0.0827738	0.128107	0.256249	0.326263
SOM	180.484	221.529	337.548	400.94
SRB	50.9053	57.2653	75.2428	85.0654
SSD	57.8711	61.8605	73.1371	79.2985
STP	0.761924	0.917427	1.35698	1.59714
SUR	3.68459	4.1217	5.35725	6.03234
SVK	13.7555	18.3597	31.3743	38.4853
SVN	3.31334	5.28015	10.8396	13.8772
SWE	-24.0671	-4.5885	50.4704	80.5536
SWZ	2.76977	3.36695	5.05495	5.97724
SYC	0.575944	0.66604	0.92071	1.05986
SYR	106.437	123.625	172.211	198.757
TCA	0.178334	0.181973	0.192261	0.197883
TCD	80.7061	98.6606	149.411	177.14
TGO	99.8051	122.644	187.202	222.475
THA	236.546	260.124	326.769	363.183
TJK	15.8712	18.4884	25.886	29.928
TKL	0.000895527	0.000947824	0.00109565	0.00117642
TKM	99.9163	118.814	172.23	201.416
TLS	4.94504	5.55986	7.29773	8.24728
TON	0.285936	0.357685	0.560492	0.671303
TTO	45.0775	53.0082	75.4253	87.6737
TUN	45.0026	49.7051	62.9972	70.2598
TUR	383.984	431.99	567.684	641.825
TUV	0.0318471	0.0354509	0.0456377	0.0512036
TWN	338.446	402.681	584.251	683.458
TZA	453.022	548.62	818.84	966.483
UGA	288.186	349.028	521.005	614.971
UKR	196.43	237.962	355.358	419.501
URY	23.8122	27.3351	37.2931	42.734
USA	1894.16	2748.1	5161.86	6480.7
UZB	248.425	285.49	390.259	447.503
VAT	0.00406959	0.00414866	0.00437216	0.00449428
VCT	0.220686	0.275571	0.430709	0.515474
VEN	210.101	239.604	322.997	368.561
VGB	0.14416	0.147035	0.155163	0.159603
VNM	351.407	383.548	474.398	524.038
VUT	1.14501	1.32916	1.84968	2.13408
WSM	0.445634	0.501953	0.661148	0.74813
YEM	122.987	141.553	194.034	222.709
ZAF	350.285	404.43	557.476	641.098
ZMB	105.79	127.568	189.125	222.759
ZWE	124.262	153.736	237.049	282.569

## Sheet: Min_Max_Distribution_Walk
region	2100_GMT<1.5C@P0.5	peak_GMT<2.0C@P0.66	peak_GMT<3.0C@P0.66	peak_GMT<4.0C@P0.66
ABW	1.62156	2.69844	2.69844	2.69844
AFG	41.8313	45.4656	138.82	198.272
AGO	101.513	105.22	141.619	142.694
AIA	0.103412	0.107733	0.112987	0.112987
ALB	7.8139	10.0337	12.5867	13.0567
AND	0.243772	0.313709	0.442142	0.480327
ARE	119.994	130.248	177.418	228.897
ARG	201.262	218.837	283.723	353.139
ARM	8.28075	10.3462	12.771	13.5018
ATG	0.421388	0.482327	0.537388	0.561879
AUS	259.493	328.006	422.498	534.647
AUT	37.7517	48.1281	56.9616	62.2825
AZE	42.3835	47.8167	63.4398	73.2381
BDI	9.9017	17.0941	285.319	410.59
BEL	52.397	67.4232	81.6541	92.2435
BEN	19.0817	24.0209	126.883	181.271
BFA	47.3893	52.3221	469.054	678.697
BGD	194.962	331.47	1038.91	1507.54
BGR	31.7861	37.3837	50.0727	59.5362
BHR	23.1489	26.3277	39.22	43.4937
BHS	-0.324686	0.851436	2.35313	2.52237
BIH	20.8477	26.8234	38.302	39.745
BLR	53.5372	62.0176	85.4689	101.284
BLZ	0.931718	1.14661	1.61392	1.65638
BOL	69.2586	84.4876	105.643	155.786
BRA	811.94	900.56	1183.14	1248.51
BRB	0.899526	1.12542	1.54957	1.97484
BRN	4.9025	6.34882	10.7581	11.4576
BTN	3.12846	3.81246	4.75837	4.99303
BWA	15.6394	21.0103	28.6627	29.6351
CAF	30.0025	37.2206	39.1001	48.5853
CAN	312.942	380.431	507.667	554.916
CHE	28.1902	35.6643	44.2481	49.1878
CHL	67.4144	80.7195	96.8763	114.36
CHN	8412.87	10067.4	13766.8	14837.4
CIV	45.0127	57.5282	232.398	331.598
CMR	34.8359	45.7673	93.3676	124.553
COD	120.552	153.363	477.895	700.751
COG	14.6564	17.8217	30.0944	30.3048
COK	0.0699407	0.08065	0.0884103	0.0884103
COL	173.02	217.607	320.973	341.057
COM	0.947303	1.4765	3.93485	14.0021
CPV	0.907628	1.23717	2.30221	2.9763
CRI	12.675	18.3706	31.7594	33.1449
CUB	28.9228	44.9053	56.8433	71.2948
CYP	5.1724	6.07193	7.36605	9.76911
CZE	57.9417	70.8842	86.339	110.05
DEU	297.289	441.465	579.501	631.714
DJI	2.5802	3.34901	5.07893	8.88596
DMA	0.184339	0.238584	0.329883	0.346774
DNK	21.7411	31.0178	38.7139	44.573
DOM	28.0758	39.3507	64.0298	68.0701
DZA	174.318	192.371	267.26	304.901
ECU	54.5652	71.0114	108.929	116.408
EGY	358.222	398.227	506.358	547.877
ERI	6.75178	14.7427	54.1437	179.321
ESP	165.198	207.604	279.925	301.819
EST	10.2067	11.816	16.1952	20.1644
ETH	177.017	232.029	1451.83	2078.3
EU27	1730.77	2216.26	2859.96	3188.58
FIN	23.4553	32.0158	38.3617	50.8333
FJI	2.37265	2.73925	3.98601	4.01254
FRA	232.479	299.93	383.655	406.709
FSM	0.39078	0.394502	0.452977	0.545478
GAB	6.57566	8.58407	12.1244	35.2325
GBR	231.531	307.156	390.135	451.166
GEO	12.558	15.798	18.8054	22.3643
GHA	42.0836	59.3904	239.134	357.041
GIN	44.0914	52.9134	134.199	208.466
GMB	3.2578	4.43182	12.8038	18.1035
GNB	2.93501	3.68944	16.1051	23.4781
GNQ	9.97956	11.4634	13.8396	14.7853
GRC	47.6839	56.315	71.7961	81.8376
GRD	0.160844	0.259522	0.359889	0.465585
GTM	34.8239	44.3202	107.377	110.269
GUY	2.73674	3.06083	3.86595	5.75188
HKG	4.71328	33.3822	39.7433	40.0722
HND	19.6964	24.46	49.1914	54.3438
HRV	12.6946	16.4199	19.1933	21.4771
HTI	23.2835	24.7841	60.6377	152.903
HUN	31.1672	38.0459	44.1375	52.2785
IDN	748.027	906.306	1322.8	1378.06
IND	3277.68	3614.28	5238.5	7719.45
IRL	28.0288	34.8462	41.3469	43.3084
IRN	503.359	612.928	756.397	973.306
IRQ	212.991	262.048	324.2	341.733
ISL	2.24446	2.61836	3.5465	4.47487
ISR	50.8625	61.6655	83.2086	91.8932
ITA	227.79	265.617	357.491	382.468
JAM	8.22058	9.87433	13.6613	17.9572
JOR	37.0392	48.1462	54.8347	60.8034
JPN	570.124	699.358	1055.02	1359.96
KAZ	170.421	257.632	454.179	501.713
KEN	82.4192	129.06	267.347	376.465
KGZ	17.8219	22.094	29.8988	43.8594
KHM	38.4203	45.7808	57.028	59.6883
KIR	0.221462	0.221462	0.46727	0.643392
KNA	0.189761	0.214613	0.298054	0.330134
KOR	278.472	348.081	465.412	514.016
KWT	61.5864	81.6113	111.964	143.227
LAO	13.8381	18.2127	45.8758	64.9112
LBN	15.9047	23.0876	31.772	36.3789
LBR	7.21973	9.56555	70.9625	101.494
LBY	47.7845	52.8914	84.7009	136.108
LCA	0.485749	0.626715	1.03281	1.09345
LIE	0.145479	0.172855	0.224831	0.3197
LKA	29.3113	44.7377	76.0721	98.6144
LSO	5.95588	6.83236	11.3921	23.7254
LTU	9.52257	11.546	18.0907	24.4952
LUX	4.26366	5.94263	7.55898	9.294
LVA	5.62611	7.14755	9.3416	10.3722
MAC	0.746481	1.7438	2.29504	2.38567
MAR	106.612	126.903	157.224	170.205
MCO	0.111498	0.169638	0.240942	0.286156
MDA	13.0991	17.0945	23.3882	26.4415
MDG	47.3404	58.5963	502.809	719.798
MDV	0.945359	1.26188	2.28927	2.83523
MEX	459.856	535.402	641.514	914.022
MHL	0.261927	0.261927	0.301036	0.336662
MKD	9.04702	10.7796	14.9187	16.2642
MLI	59.0807	67.2522	178.685	253.71
MLT	1.56577	1.93074	2.52007	2.82321
MMR	95.0008	114.558	132.069	156.214
MNE	2.81261	3.03644	3.94947	4.53207
MNG	28.355	39.7783	60.0864	62.7103
MOZ	58.6724	64.5264	347.885	486.764
MRT	11.8563	13.7368	17.8999	25.3925
MUS	6.69899	7.96309	11.3647	14.0048
MWI	17.7323	25.3952	327.558	467.962
MYS	194.265	244.031	303.349	359.352
NAM	11.2094	12.6753	17.8154	18.195
NER	53.2784	67.3073	535.017	758.701
NGA	367.024	483.117	1209.63	1230.22
NIC	18.5828	23.0696	31.6736	33.9918
NIU	0.00776971	0.0131428	0.67646	0.67646
NLD	85.5372	104.505	126.799	141.199
NOR	19.7719	29.3907	39.0593	42.2499
NPL	53.2118	67.225	415.51	593.18
NRU	0.022343	0.0284319	0.0427041	0.0499168
NZL	34.8595	44.4104	56.4644	69.0373
OMN	49.2129	61.3776	84.1454	89.5853
PAK	352.986	550.482	1107.45	1774.87
PAN	12.5759	15.796	22.7313	23.1393
PER	86.3492	118.14	160.806	167.626
PHL	190.46	217.763	491.334	517.852
PLW	0.184603	0.216721	0.278061	0.2842
PNG	13.3778	18.7852	70.4857	71.8369
POL	195.408	231.045	286.227	331.737
PRK	110.974	129.889	135.151	172.924
PRT	37.0435	44.7951	62.7515	64.0844
PRY	38.6375	51.5131	66.4271	69.264
QAT	84.4776	123.484	207.335	226.118
ROU	53.8587	68.3154	89.4792	113.956
RUS	919.346	1187.06	1621.72	1828.33
RWA	10.8675	26.4899	286.465	410.719
SAU	385.622	454.648	601.756	639.622
SDN	103.619	127.049	160.092	201.058
SEN	29.6565	39.1453	138.17	196.547
SGP	24.8072	30.5553	43.4661	43.8681
SHN	0.0107948	0.0126209	0.0127001	0.0127001
SLB	0.467453	0.620035	0.901224	3.70511
SLE	9.63597	16.4392	71.9178	98.7953
SLV	12.8482	14.9045	24.0563	27.2575
SMR	0.120411	0.13723	0.276341	0.303516
SOM	35.378	50.5036	343.863	372.982
SRB	46.896	56.6766	77.1195	102.481
SSD	49.2317	59.0097	75.4473	75.5309
STP	0.369597	0.416387	1.25769	1.81924
SUR	2.6644	3.0164	5.32531	5.79313
SVK	22.7919	26.3016	31.3217	43.0536
SVN	6.64848	9.84075	11.9523	13.4383
SWE	25.7243	39.9033	61.2071	63.0683
SWZ	2.66769	2.75016	4.88141	5.76438
SYC	0.357622	0.428854	0.839332	4.01214
SYR	87.34	110.74	178.625	203.423
TCA	0.180212	0.181694	0.194445	0.194445
TCD	37.6633	42.4438	138.377	200.934
TGO	15.829	20.8534	169.829	252.015
THA	215.355	251.576	339.212	471.559
TJK	16.3737	22.5787	26.355	44.7698
TKL	0.00073857	0.00110172	0.00112703	0.00112703
TKM	57.5482	119.843	182.784	191.242
TLS	4.13696	4.68905	7.62935	7.68864
TON	0.129952	0.216528	0.563518	0.758433
TTO	39.9674	52.7146	79.7594	90.7315
TUN	38.5515	46.2175	64.0718	69.1015
TUR	377.631	463.427	583.953	634.746
TUV	0.0252071	0.0252071	0.0466553	0.0505808
TWN	192.224	211.984	616.362	636.077
TZA	124.196	141.328	773.861	1089.16
UGA	73.8119	85.562	489.975	699.338
UKR	181.165	218.961	374.321	446.298
URY	19.0701	22.6037	37.5445	41.489
USA	2466.67	3429.85	5068.84	5986.03
UZB	187.987	282.647	412.499	608.747
VAT	0.00408332	0.00415948	0.00441961	0.00441961
VCT	0.210077	0.271559	0.451087	0.5315
VEN	156.362	189.867	245.687	485.868
VGB	0.145795	0.146433	0.156888	0.156888
VNM	341.49	435.03	492.953	510.369
VUT	0.873963	1.04478	1.87901	2.11605
WSM	0.401783	0.471869	0.660063	0.799172
YEM	64.7176	79.9479	199.8	257.262
ZAF	338.94	420.019	568.918	600.387
ZMB	44.5733	55.8134	181.031	247.337
ZWE	27.2244	34.3335	219.264	319.536

## Sheet: Min_Max_Linear_Walk
region	2100_GMT<1.5C@P0.5	peak_GMT<2.0C@P0.66	peak_GMT<3.0C@P0.66	peak_GMT<4.0C@P0.66
ABW	1.51084	1.70017	2.25939	2.55053
AFG	111.319	130.021	185.264	214.024
AGO	69.1054	80.8407	115.504	133.55
AIA	0.104111	0.105526	0.109706	0.111882
ALB	7.62785	8.55359	11.2881	12.7116
AND	-0.262837	-0.144316	0.205771	0.388025
ARE	130.619	148.285	200.467	227.633
ARG	205.204	229.189	300.035	336.918
ARM	9.78906	11.4331	16.2893	18.8175
ATG	0.134316	0.206482	0.419644	0.530616
AUS	151.095	215.876	407.226	506.841
AUT	-6.11529	7.64825	48.303	69.4677
AZE	64.1109	72.628	97.7859	110.883
BDI	191.45	226.385	329.576	383.297
BEL	-13.3113	8.86849	74.3832	108.49
BEN	88.1867	103.026	146.859	169.678
BFA	323.975	380.524	547.56	634.517
BGD	682.451	813.985	1202.51	1404.77
BGR	28.3324	34.2174	51.6007	60.6503
BHR	40.2738	46.048	63.1039	71.9832
BHS	-0.710888	-0.195447	1.32706	2.11968
BIH	23.3553	25.9918	33.7793	37.8334
BLR	61.559	68.5542	89.2167	99.9735
BLZ	0.699677	0.85265	1.3045	1.53973
BOL	93.1437	106.231	144.89	165.016
BRA	801.938	874.405	1088.46	1199.89
BRB	0.970642	1.28344	2.20737	2.68836
BRN	-2.97159	-0.507184	6.77218	10.5618
BTN	3.12151	3.55723	4.84428	5.51431
BWA	16.4459	18.5485	24.7592	27.9924
CAF	-32.4032	1.37193	101.137	153.074
CAN	174.356	250.699	476.201	593.597
CHE	-83.3198	-61.1494	4.33738	38.4295
CHL	71.5882	83.098	117.096	134.795
CHN	9390.43	10581.4	14099.2	15930.5
CIV	160.415	187.705	268.313	310.277
CMR	61.6978	71.7182	101.316	116.725
COD	346.208	408.581	592.818	688.731
COG	15.7887	18.5427	26.6774	30.9123
COK	0.0216996	0.0323345	0.063748	0.0801017
COL	160.7	189.452	274.381	318.594
COM	7.18808	8.47154	12.2626	14.2363
CPV	1.4249	1.67222	2.40276	2.78308
CRI	11.9574	15.3351	25.3121	30.5061
CUB	41.8515	47.6184	64.6526	73.5205
CYP	5.78186	6.75157	9.6159	11.1071
CZE	32.8128	48.3935	94.416	118.375
DEU	-232.269	-52.877	477.012	752.87
DJI	4.04186	4.96506	7.69199	9.11162
DMA	0.192658	0.217227	0.289798	0.327579
DNK	-30.0844	-15.7271	26.6816	48.7594
DOM	22.0576	29.3929	51.0597	62.3394
DZA	204.632	228.745	299.971	337.051
ECU	70.8314	78.0972	99.5589	110.732
EGY	353.113	384.162	475.875	523.62
ERI	84.7447	100.545	147.215	171.511
ESP	23.758	73.3571	219.863	296.133
EST	7.49571	9.94327	17.1729	20.9366
ETH	994.096	1166.94	1677.48	1943.27
EU27	-230.382	438.573	2414.53	3443.21
FIN	3.28195	14.1751	46.3512	63.1019
FJI	1.94437	2.27408	3.24796	3.75496
FRA	-129.378	-31.8401	256.268	406.256
FSM	0.376011	0.41355	0.524435	0.582161
GAB	23.3793	30.3843	51.0758	61.8477
GBR	-242.434	-111.641	274.696	475.821
GEO	16.2685	18.5658	25.3514	28.884
GHA	165.113	195.71	286.087	333.137
GIN	97.7008	115.359	167.517	194.67
GMB	8.96266	10.4199	14.7242	16.965
GNB	11.1462	13.1122	18.9191	21.9422
GNQ	9.37104	10.4967	13.8217	15.5527
GRC	31.3403	43.9888	81.35	100.8
GRD	0.1134	0.175516	0.358995	0.454514
GTM	56.3874	64.9771	90.3496	103.558
GUY	3.69663	4.18841	5.64102	6.39724
HKG	-32.9357	-21.2969	13.0819	30.9793
HND	30.7079	34.4759	45.6058	51.4
HRV	8.99259	11.827	20.1991	24.5576
HTI	80.9954	94.612	134.833	155.771
HUN	3.26126	12.4234	39.4864	53.5753
IDN	795.102	889.128	1166.86	1311.45
IND	4786.86	5419.31	7287.45	8260
IRL	-18.1817	-6.12912	29.4718	48.0055
IRN	684.674	766.035	1006.36	1131.47
IRQ	385.173	436.973	589.981	669.637
ISL	1.04279	1.59093	3.21002	4.05292
ISR	36.8512	45.8657	72.4926	86.3545
ITA	-95.2171	-4.18047	264.724	404.714
JAM	-2.74578	0.554654	10.3035	15.3787
JOR	39.7703	44.3129	57.7309	64.7162
JPN	88.127	292.368	895.654	1209.72
KAZ	273.45	309.84	417.327	473.284
KEN	191.557	221.035	308.107	353.436
KGZ	37.4456	43.4428	61.1572	70.3792
KHM	37.3642	40.9231	51.4353	56.9079
KIR	0.347715	0.410355	0.595382	0.691706
KNA	0.155895	0.197157	0.319036	0.382486
KOR	228.597	292.025	479.378	576.914
KWT	70.0901	81.8535	116.6	134.69
LAO	31.4891	36.8172	52.5554	60.7486
LBN	16.7671	19.93	29.2723	34.1359
LBR	47.8835	56.43	81.6747	94.8169
LBY	37.5461	53.9946	102.58	127.874
LCA	0.585753	0.69006	0.998163	1.15856
LIE	-1.05082	-0.831871	-0.185154	0.151524
LKA	24.3485	36.8801	73.8958	93.1661
LSO	12.9898	15.0016	20.9441	24.0377
LTU	6.03047	9.62059	20.2251	25.7457
LUX	-9.93699	-6.51298	3.60086	8.86608
LVA	1.87951	3.46499	8.14818	10.5862
MAC	-10.6695	-8.58634	-2.43321	0.770086
MAR	107.487	117.971	148.937	165.059
MCO	-1.35449	-1.09085	-0.312131	0.0932686
MDA	16.9888	20.2733	29.9751	35.0258
MDG	333.543	395.119	577.003	671.691
MDV	0.574592	0.941327	2.02459	2.58854
MEX	495.226	563.122	763.674	868.08
MHL	0.219643	0.245868	0.323332	0.36366
MKD	11.6567	12.9053	16.5937	18.5138
MLI	129.111	148.975	207.647	238.192
MLT	0.153993	0.605709	1.93999	2.63461
MMR	85.8677	97.1325	130.406	147.728
MNE	2.73377	3.04034	3.94588	4.4173
MNG	9.61809	18.082	43.0826	56.0978
MOZ	234.595	274.796	393.54	455.357
MRT	26.1926	31.0929	45.5675	53.1029
MUS	13.3712	15.5117	21.8345	25.1261
MWI	219.392	259.019	376.068	437.003
MYS	173.739	211.099	321.453	378.903
NAM	8.14733	9.74912	14.4805	16.9436
NER	363.905	426.843	612.749	709.53
NGA	636.626	732.748	1016.67	1164.48
NIC	20.6196	22.7514	29.0482	32.3263
NIU	-2.84287	-2.28183	-0.624605	0.238138
NLD	-12.1019	21.6483	121.34	173.238
NOR	-59.9332	-42.0088	10.9363	38.4992
NPL	279.344	329.376	477.158	554.093
NRU	0.000224568	0.00839883	0.032544	0.0451138
NZL	28.67	35.7522	56.6718	67.5625
OMN	52.9607	59.4115	78.4656	88.3852
PAK	959.44	1114.43	1572.24	1810.57
PAN	2.19701	5.53559	15.3971	20.531
PER	98.8775	109.837	142.21	159.064
PHL	227.493	275.121	415.805	489.044
PLW	0.199565	0.213057	0.252911	0.273659
PNG	35.3362	41.1551	58.343	67.2909
POL	173.2	207.27	307.906	360.296
PRK	107.33	119.318	154.729	173.163
PRT	9.79702	18.4752	44.1087	57.4534
PRY	38.7445	43.6687	58.2138	65.7859
QAT	110.991	129.344	183.557	211.779
ROU	22.7289	38.5783	85.3942	109.766
RUS	903.865	1073.42	1574.25	1834.98
RWA	191.929	226.808	329.834	383.469
SAU	387.48	431.539	561.682	629.434
SDN	-1.63843	40.0021	163	227.032
SEN	95.4172	111.539	159.16	183.952
SGP	-19.9096	-9.56815	20.9785	36.881
SHN	0.011333	0.011551	0.0121947	0.0125298
SLB	1.51502	2.08344	3.76245	4.63654
SLE	46.1322	54.5277	79.3262	92.2362
SLV	10.8834	13.4937	21.2041	25.2181
SMR	-0.126765	-0.057639	0.146547	0.252845
SOM	173.658	205.434	299.294	348.157
SRB	71.7058	80.8883	108.012	122.132
SSD	57.3098	60.2146	68.7947	73.2615
STP	0.529676	0.735256	1.3425	1.65863
SUR	3.27972	3.6804	4.86395	5.48009
SVK	10.0455	15.7427	32.5713	41.3322
SVN	4.26759	6.60343	13.503	17.0949
SWE	-56.9451	-37.7628	18.8981	48.3955
SWZ	2.72513	3.20965	4.6408	5.38586
SYC	2.80857	3.29747	4.74159	5.4934
SYR	106.864	122.258	167.726	191.397
TCA	0.177822	0.180472	0.1883	0.192375
TCD	89.2381	107.044	159.641	187.022
TGO	119.752	140.837	203.118	235.542
THA	294.456	331.824	442.202	499.665
TJK	23.5742	28.6535	43.6571	51.4678
TKL	0.000888169	0.000926248	0.00103872	0.00109728
TKM	98.5172	113.299	156.963	179.693
TLS	4.43559	4.95418	6.48602	7.28348
TON	0.345031	0.410935	0.605602	0.706945
TTO	58.5033	68.3766	97.5404	112.723
TUN	43.904	47.921	59.7863	65.9633
TUR	358.861	404.802	540.502	611.147
TUV	0.0342156	0.0377549	0.0482093	0.0536518
TWN	293.841	348.399	509.555	593.452
TZA	529.749	618.93	882.353	1019.49
UGA	337.402	395.102	565.534	654.26
UKR	263.38	327.755	517.906	616.898
URY	23.101	26.0485	34.7546	39.287
USA	404.374	1392.8	4312.43	5832.37
UZB	573.117	666.637	942.876	1086.68
VAT	0.00405847	0.00411604	0.0042861	0.00437463
VCT	0.240769	0.296059	0.459374	0.544395
VEN	305.585	346	465.379	527.527
VGB	0.143755	0.145849	0.152033	0.155252
VNM	344.095	373.64	460.912	506.345
VUT	1.16539	1.31694	1.7646	1.99764
WSM	0.438833	0.497077	0.66912	0.758684
YEM	155.148	178.926	249.161	285.725
ZAF	380.981	433.317	587.906	668.385
ZMB	113.494	134.831	197.856	230.667
ZWE	145.01	172.832	255.015	297.799
